# Supplementary material for: Composition rules in original and cumulative prospect theory
Source: Springer Nature journal article supplement (doi:10.1007/s11238-022-09873-0), 2022-03-21
Supplement: MOESM1 [file 11238_2022_9873_MOESM1_ESM.pdf]

# Supplement

We report two additional estimation procedures to complement the nonlinear regression (NLR) estimation reported in the main text. The additional estimation procedures were (1) a restricted maximum likelihood nonlinear mixed (REML-NLME) regression model and (2) a Bayesian nonlinear mixed (Bayes-NLME) regression model. Overall, the results of these two estimation procedures were similar to each other and similar to those reported in the main text using NLR.

## Two-outcome gambles

### **Table S1: Coefficients for the restricted maximum likelihood nonlinear mixed regression with heterogeneous error term**

The REML-NLME model offers some benefits over the individual subject nonlinear regression model reported in the paper. Namely, REML-NLME offers shrinkage of the coefficients based on the variability of each subject's data and reduces the effective number of parameters that are being estimated (see Pinheiro & Bates, 2000). However, the model comes at the cost of having to make additional assumptions that are beyond OPT and CPT regarding the distribution of the three unknown parameters. We conducted a heterogeneous error version of the REML-NLME to be consistent with the subject-level NLRs reported in the main text, which defined a separate error term for each subject. A reduced REML-NLME regression model with a single error variance for all 47 subjects yielded a residual standard deviation that was more than twice as high as the heterogeneous error model, suggesting heterogeneity in error variance and support for the model with a heterogeneous error variance. The REML-NLME regression was implemented in *R* using the *nlme* package.

Table S1 reports the coefficients for the 47 subjects as well as the fixed effect estimates for the REML-NLME regression.

The variances for the random effects were  $V(\alpha)=0.052$ ,  $V(\delta)=0.106$  and  $V(\gamma)=0.094$ . The correlations between the random effects were  $\text{Cor}(\alpha, \delta)=-0.127$ ,  $\text{Cor}(\alpha, \gamma)=0.204$  and  $\text{Cor}(\delta, \gamma)=0.214$

|              | $\alpha$ | $\delta$ | $\gamma$ |
|--------------|----------|----------|----------|
| 1            | 0.653    | 0.489    | 0.388    |
| 2            | 0.307    | 1.072    | 0.655    |
| 3            | 0.769    | 1.161    | 0.406    |
| 4            | 0.588    | 0.213    | 0.154    |
| 5            | 0.460    | 0.991    | 0.282    |
| 6            | 0.702    | 1.264    | 0.897    |
| 7            | 0.597    | 0.384    | 0.203    |
| 8            | 0.388    | 0.399    | 0.362    |
| 9            | 0.525    | 0.885    | 0.859    |
| 10           | 0.484    | 0.862    | 0.506    |
| 11           | 0.730    | 1.150    | 0.628    |
| 12           | 0.700    | 0.860    | 0.494    |
| 13           | 0.359    | 1.284    | 1.499    |
| 14           | 0.605    | 0.645    | 0.355    |
| 15           | 0.977    | 0.918    | 1.020    |
| 16           | 0.885    | 0.885    | 1.167    |
| 17           | 0.934    | 0.866    | 0.997    |
| 18           | 0.656    | 0.500    | 0.187    |
| 19           | 0.559    | 1.275    | 0.292    |
| 20           | 0.883    | 0.667    | 0.640    |
| 21           | 0.719    | 0.914    | 0.561    |
| 22           | 0.390    | 1.143    | 0.871    |
| 23           | 0.583    | 0.722    | 0.513    |
| 24           | 1.035    | 0.944    | 1.006    |
| 25           | 0.766    | 1.118    | 0.573    |
| 26           | 1.050    | 1.102    | 0.947    |
| 27           | 0.993    | 0.653    | 0.811    |
| 28           | 0.630    | 1.038    | 0.663    |
| 29           | 0.625    | 1.128    | 0.294    |
| 30           | 0.614    | 0.797    | 0.530    |
| 31           | 0.789    | 0.777    | 0.717    |
| 32           | 0.898    | 0.776    | 0.764    |
| 33           | 0.843    | 0.709    | 0.112    |
| 34           | 1.206    | 1.431    | 0.319    |
| 35           | 0.799    | 1.075    | 0.708    |
| 36           | 0.685    | 1.052    | 0.525    |
| 37           | 0.772    | 0.819    | 0.555    |
| 38           | 0.705    | 0.900    | 0.206    |
| 39           | 0.766    | 0.889    | 0.714    |
| 40           | 0.910    | 1.226    | 0.879    |
| 41           | 1.021    | 0.682    | 1.068    |
| 42           | 1.029    | 0.549    | 0.829    |
| 43           | 0.810    | 1.361    | 0.710    |
| 44           | 1.013    | 1.123    | 0.280    |
| 45           | 0.538    | 0.520    | 0.226    |
| 46           | 0.986    | 1.015    | 0.339    |
| 47           | 0.742    | 0.801    | 0.753    |
| fixed effect | 0.738    | 0.894    | 0.606    |

Table S1: Restricted Maximum Likelihood Nonlinear Mixed Regression Estimates (Heterogeneous Error)

**Table S2: Coefficients for the Bayesian nonlinear mixed regression with heterogenous error term**

To compare with the REML-NLME model, we implemented the analogous model in a Bayesian context. The Bayesian model offers additional advantages over a frequentist approach to nonlinear mixed model regression, such as additional flexibility in the choice of the prior distributions over the parameters and the ability to probe the posterior distribution. To be consistent with the REML-NLME estimation we assumed normally distributed priors on the three prospect theory parameters. We followed a basic modeling strategy mostly using default arguments to the *brm* command in *R*'s *brms* package, which offers a convenient interface to the *STAN* Bayesian modeling framework. We used the lower bound feature (set to 0) for each of the three parameters to avoid negative parameter values. A more complete Bayesian analysis would involve sensitivity analyses over the choice of prior, different choices for the various command arguments, and examination of other approaches to maintaining the scale of the parameters to be non-negative (such as reparameterization of the parameters). Various criteria such as convergence metrics and posterior predictive checks suggested acceptable fits.

Table S2 reports the coefficients for the 47 subjects as well as the fixed effect estimates for the Bayes-NLME regression.

The variances for the random effects were  $V(\alpha)=0.056$ ,  $V(\delta)=0.128$  and  $V(\gamma)=0.106$ . The correlations between the random effects were  $\text{Cor}(\alpha, \delta)=-0.086$ ,  $\text{Cor}(\alpha, \gamma)=0.196$  and  $\text{Cor}(\delta, \gamma)=0.201$ .

|              | $\alpha$ | $\delta$ | $\gamma$ |
|--------------|----------|----------|----------|
| 1            | 0.632    | 0.541    | 0.383    |
| 2            | 0.313    | 1.114    | 0.659    |
| 3            | 0.755    | 1.235    | 0.405    |
| 4            | 0.567    | 0.240    | 0.147    |
| 5            | 0.456    | 1.045    | 0.282    |
| 6            | 0.687    | 1.327    | 0.893    |
| 7            | 0.578    | 0.420    | 0.199    |
| 8            | 0.379    | 0.448    | 0.359    |
| 9            | 0.515    | 0.939    | 0.860    |
| 10           | 0.478    | 0.918    | 0.506    |
| 11           | 0.724    | 1.212    | 0.633    |
| 12           | 0.681    | 0.929    | 0.491    |
| 13           | 0.361    | 1.340    | 1.510    |
| 14           | 0.600    | 0.709    | 0.357    |
| 15           | 0.954    | 0.976    | 1.014    |
| 16           | 0.871    | 0.945    | 1.166    |
| 17           | 0.913    | 0.928    | 0.992    |
| 18           | 0.648    | 0.557    | 0.187    |
| 19           | 0.552    | 1.341    | 0.292    |
| 20           | 0.854    | 0.732    | 0.634    |
| 21           | 0.705    | 0.979    | 0.560    |
| 22           | 0.403    | 1.179    | 0.881    |
| 23           | 0.575    | 0.783    | 0.513    |
| 24           | 1.012    | 0.987    | 0.998    |
| 25           | 0.761    | 1.181    | 0.580    |
| 26           | 1.035    | 1.173    | 0.951    |
| 27           | 0.966    | 0.715    | 0.805    |
| 28           | 0.628    | 1.101    | 0.692    |
| 29           | 0.617    | 1.192    | 0.295    |
| 30           | 0.597    | 0.866    | 0.527    |
| 31           | 0.780    | 0.843    | 0.719    |
| 32           | 0.882    | 0.841    | 0.764    |
| 33           | 0.835    | 0.764    | 0.113    |
| 34           | 1.197    | 1.523    | 0.323    |
| 35           | 0.784    | 1.134    | 0.708    |
| 36           | 0.675    | 1.117    | 0.526    |
| 37           | 0.756    | 0.876    | 0.553    |
| 38           | 0.700    | 0.958    | 0.207    |
| 39           | 0.749    | 0.950    | 0.711    |
| 40           | 0.898    | 1.295    | 0.882    |
| 41           | 0.996    | 0.740    | 1.063    |
| 42           | 0.994    | 0.616    | 0.821    |
| 43           | 0.794    | 1.433    | 0.708    |
| 44           | 1.002    | 1.198    | 0.281    |
| 45           | 0.528    | 0.568    | 0.224    |
| 46           | 0.955    | 1.093    | 0.336    |
| 47           | 0.736    | 0.865    | 0.757    |
| fixed effect | 0.725    | 0.954    | 0.604    |

Table S2: Bayesian Nonlinear Mixed Regression Estimates (Heterogeneous Error)

### Figure S1: Coefficient Plot

Figure S1 shows the parameter estimates reported in the main text using nonlinear regression and the estimates for both the REML-NLME and Bayes NLME models. The points were jittered in the vertical direction to uncover points that are superimposed. The vertical axis represents subject number so does not change the value of the parameter, which is represented in the horizontal direction.

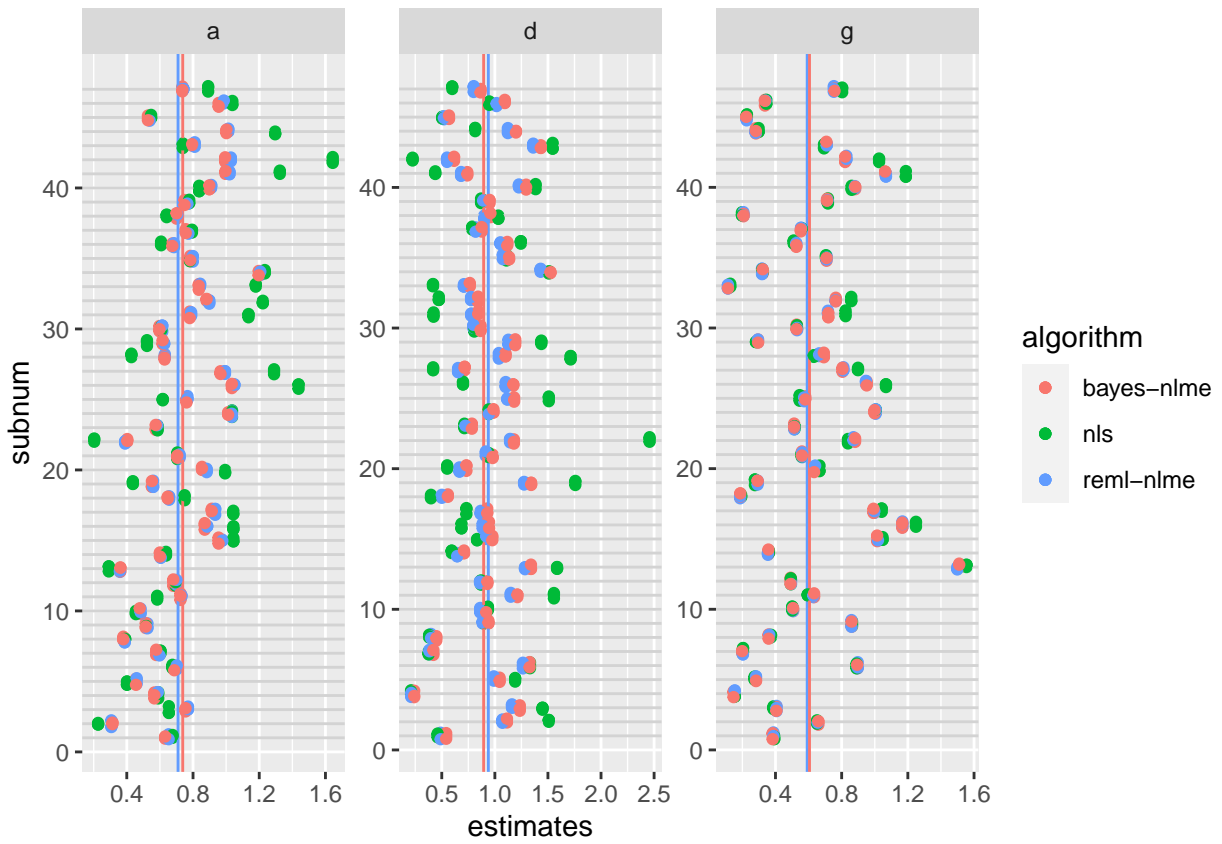

Figure S1: Coefficient Comparison: Subject number on the vertical axis, coefficient value on the horizontal axis.

## Three-outcome gambles

### REML-NLME

Figure S2 shows the REML-NLME plot corresponding to Figure 2 in the main text (NLR) using the fixed effects estimates. The general pattern is consistent with the NLR results reported in the text.

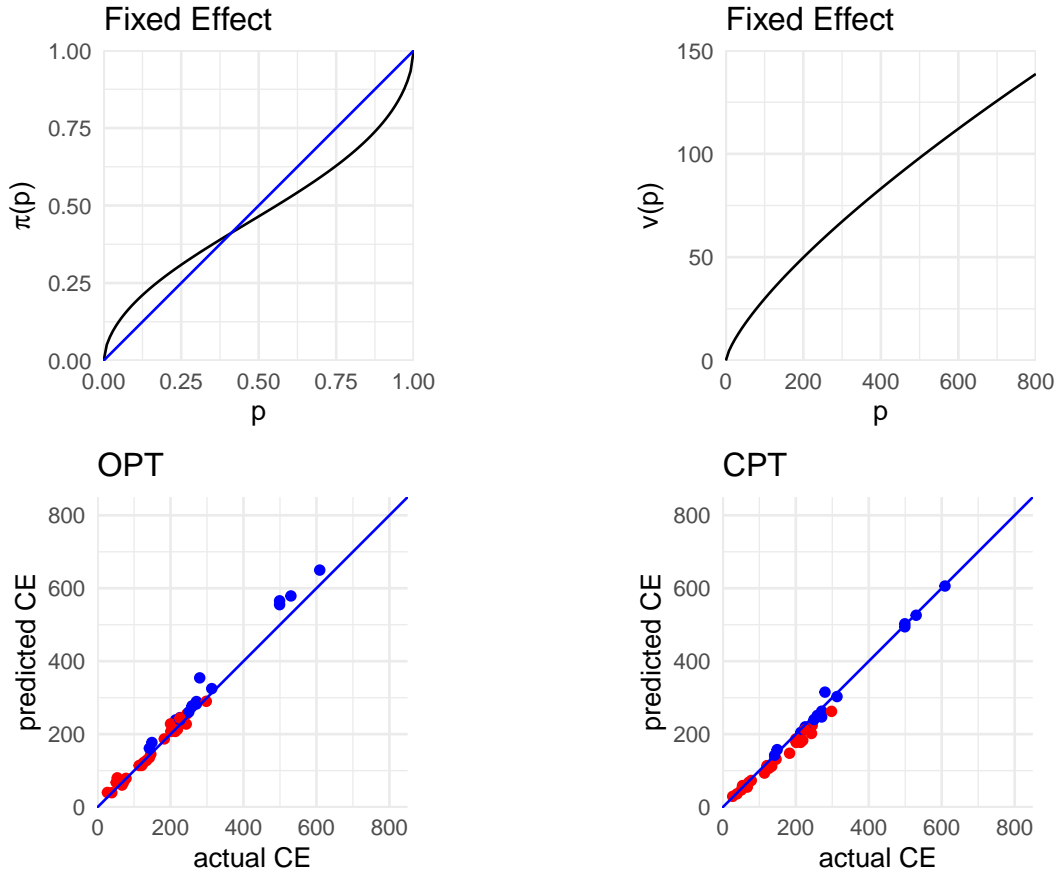

Figure S2: Actual vs Predicted CE for REML-NLME.

Consistent with the finding reported in the main text, the estimated slopes for REML-NLME using the fixed effects indicate that CPT slightly under-predicts ( $\beta_C = .964$ ,  $p < .001$ ) and OPT slightly over-predicts ( $\beta_O = 1.074$ ,  $p < .001$ ); interaction effect testing difference of the two slopes is statistically significant ( $p < .001$ ).

## Bayes-NLME

Figure S3 shows the Bayes-NLME plot corresponding to Figure 2 in the main text (NLR) using the fixed effects estimates. The general pattern is consistent with the NLR results reported in the text.

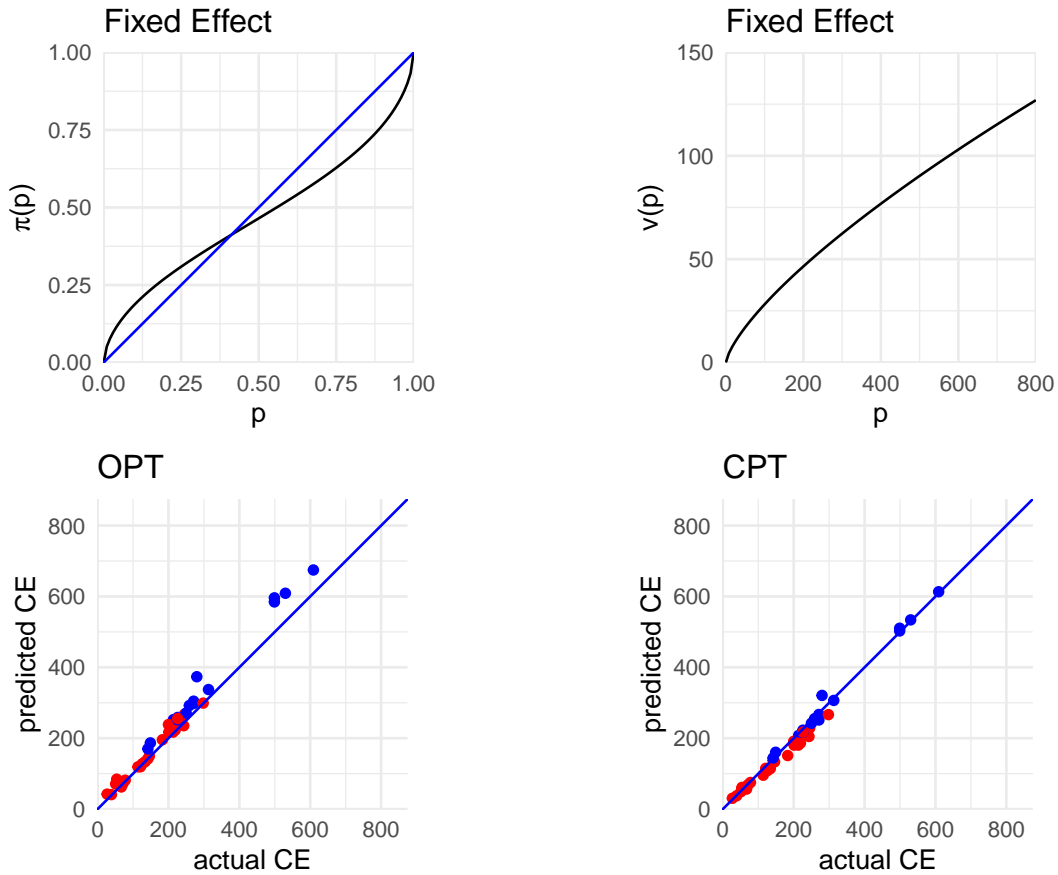

Figure S3: Actual vs Predicted CE for Bayes-NLME.

Consistent with the finding reported in the main text, the estimated slopes for Bayes-NLME using the fixed effects indicate that CPT slightly under-predicts ( $\beta_C = .978$ ,  $p < .001$ ) and OPT slightly over-predicts ( $\beta_O = 1.125$ ,  $p < .001$ ); interaction effect testing difference of the two slopes is statistically significant ( $p < .001$ ).

## References

Pinheiro, J. & Bates, D. (2000). Mixed-effects Models in S and S-Plus. Springer: New York.
